# Supplementary material for: Unraveling a Small Secreted Peptide SUBPEP3 That Positively Regulates Salt-Stress Tolerance in Pyrus betulifolia
Source: MDPI journal article supplement (doi:10.3390/ijms25094612), 2024-04-23
Supplement: s1 [file s1]

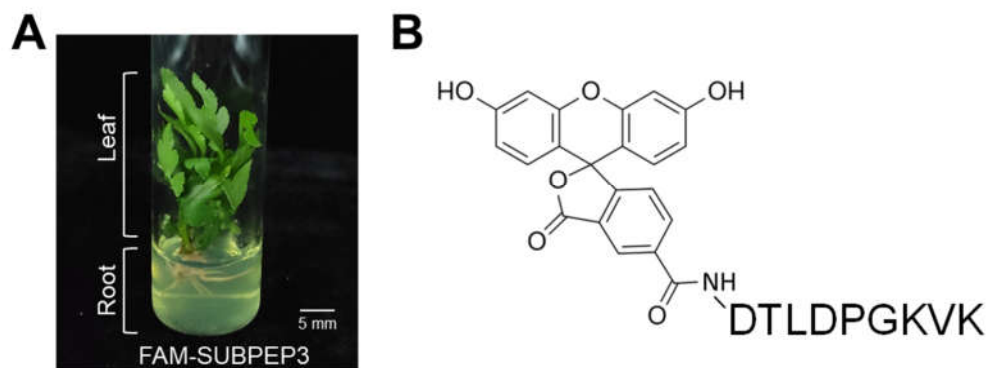

**Figure S1.** The mobility identification of SUBPEP3 in *P. betulaefolia*. **(A)** The photograph of *P. betulaefolia* culture seedlings cultured in the medium with 10  $\mu$ M FAM-SUBPEP3. **(B)** Structure of FAM-SUBPEP3.

**Table S1.** The SSP genes identified in the *Pyrus betulaefolia* genome.

**Table S2.** The gene function annotation, GO and KEGG analysis of SSP genes identified in the *Pyrus betulaefolia* genome.

**Table S3.** Primers used in this study.
